# Supplementary material for: Species-specific differences in the fine structure of learning walk elements inCataglyphisants
Source: Oxford University Press journal article supplement (doi:10.1242/jeb.158147), 2017-07-01
Supplement: jeb158147supp.pdf [file jeb158147supp.pdf]

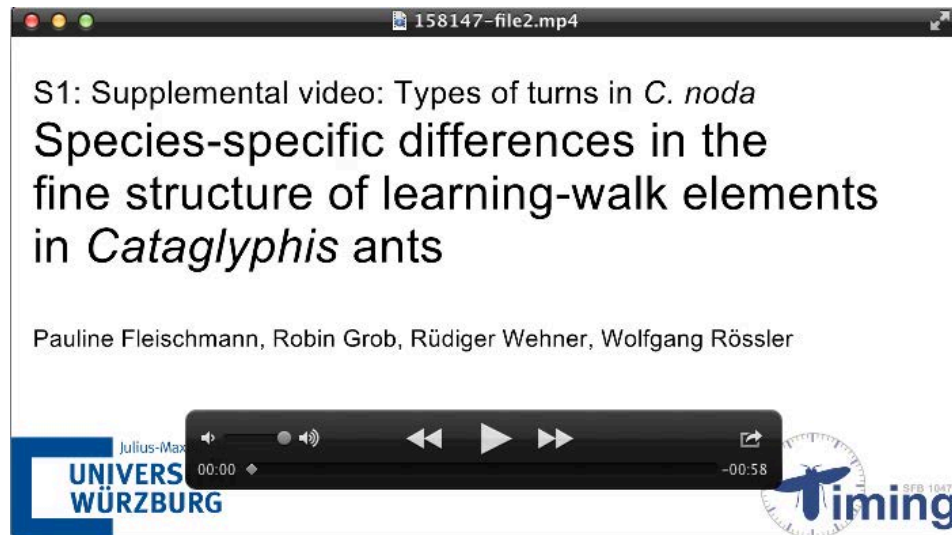

**Movie 1: Types of turns in *C. noda*.** First, the panoramic pictures show the striking differences between the Tunisian saltpan and the Greek pine forest. Then the trace of a complete learning walk of a *C. noda* is shown together with the ant recorded sideways in original speed. Afterwards the different types of turns in *C. noda* are shown in slow motion (slowed four times).
